# Supplementary material for: Proteomic analysis of exosomes derived from human mature milk and colostrum of mothers with term, late preterm, or very preterm delivery
Source: Royal Society of Chemistry journal article supplement (doi:10.1039/d3ay01114c), 2023-01-01
Supplement: d3ay01114c1.pdf [file d3ay01114c1.pdf]

| <i>Accession</i>                             | <i>Significance<br/>(-10lgP)</i> | <i>Coverage<br/>(%)</i> | <i>#<br/>Peptides</i> | <i>#<br/>Unique</i> | <i>PTM</i> | <i>Description</i>                                                                      |
|----------------------------------------------|----------------------------------|-------------------------|-----------------------|---------------------|------------|-----------------------------------------------------------------------------------------|
| <u><i>P35527/K1C9_HUMAN</i></u>              | 99.47                            | 82                      | 83                    | 83                  | Y          | Keratin, type I cytoskeletal 9<br>OS=Homo sapiens OX=9606 GN=KRT9 PE=1 SV=3             |
| <u><i>P13645/K1C10_HUMAN</i></u>             | 83.42                            | 76                      | 100                   | 88                  | Y          | Keratin, type I cytoskeletal 10<br>OS=Homo sapiens OX=9606 GN=KRT10 PE=1 SV=6           |
| <u><i>tr/H6VRF8/H6VRF8_HUMAN</i></u>         | 79.63                            | 84                      | 106                   | 2                   | Y          | Cytokeratin-1<br>OS=Homo sapiens OX=9606 GN=KRT1 PE=3 SV=1                              |
| <u><i>P05814/CASB_HUMAN</i></u>              | 79.62                            | 88                      | 65                    | 65                  | Y          | Beta-casein<br>OS=Homo sapiens OX=9606 GN=CSN2 PE=1 SV=4                                |
| <u><i>tr/A0A080YV01/A0A080YV01_HUMAN</i></u> | 78.37                            | 47                      | 12                    | 12                  | Y          | Lactose synthase B protein<br>OS=Homo sapiens OX=9606 GN=LYZG PE=3 SV=1                 |
| <u><i>tr/Q6FHZ7/Q6FHZ7_HUMAN</i></u>         | 75.99                            | 49                      | 17                    | 17                  | Y          | Perilipin<br>OS=Homo sapiens OX=9606 GN=ADFP PE=2 SV=1                                  |
| <u><i>tr/D6RD17/D6RD17_HUMAN</i></u>         | 69.52                            | 17                      | 2                     | 2                   | Y          | Immunoglobulin J chain (Fragment)<br>OS=Homo sapiens OX=9606 GN=JCHAIN PE=1 SV=8        |
| <u><i>P07498/CASK_HUMAN</i></u>              | 68.40                            | 62                      | 25                    | 25                  | Y          | Kappa-casein<br>OS=Homo sapiens OX=9606 GN=CSN3 PE=1 SV=3                               |
| <u><i>P35908/K22E_HUMAN</i></u>              | 60.60                            | 90                      | 88                    | 74                  | Y          | Keratin, type II cytoskeletal 2 epidermal<br>OS=Homo sapiens OX=9606 GN=KRT2 PE=1 SV=2  |
| <u><i>tr/V9HWA9/V9HWA9_HUMAN</i></u>         | 58.53                            | 61                      | 76                    | 69                  | Y          | C3-beta-c<br>OS=Homo sapiens OX=9606 GN=HEL-S-62p PE=2 SV=1                             |
| <u><i>Q16555-2/DPYL2_HUMAN</i></u>           | 43.00                            | 13                      | 5                     | 3                   | Y          | Isoform 2 of Dihydropyrimidinase-related protein 2<br>OS=Homo sapiens OX=9606 GN=DPYSL2 |
| <u><i>P08779/K1C16_HUMAN</i></u>             | 42.99                            | 75                      | 39                    | 18                  | Y          | Keratin, type I cytoskeletal 16<br>OS=Homo sapiens OX=9606 GN=KRT16 PE=1 SV=4           |
| <u><i>P19835/CEL_HUMAN</i></u>               | 42.32                            | 53                      | 74                    | 10                  | Y          | Bile salt-activated lipase<br>OS=Homo sapiens OX=9606 GN=CEL PE=1 SV=3                  |
| <u><i>P01833/PIGR_HUMAN</i></u>              | 42.22                            | 68                      | 64                    | 64                  | Y          | Polymeric immunoglobulin receptor<br>OS=Homo sapiens OX=9606 GN=PIGR PE=1 SV=4          |
| <u><i>tr/Q4VAN1/Q4VAN1_HUMAN</i></u>         | 42.06                            | 40                      | 22                    | 22                  | Y          | BTN1A1 protein<br>OS=Homo sapiens OX=9606 GN=BTN1A1 PE=1 SV=1                           |
| <u><i>P49327/FAS_HUMAN</i></u>               | 39.97                            | 42                      | 77                    | 77                  | Y          | Fatty acid synthase                                                                     |

|                                       |       |    |    |    |   |                                                                                                                                                        |
|---------------------------------------|-------|----|----|----|---|--------------------------------------------------------------------------------------------------------------------------------------------------------|
| <u>P47989 XDH_HUMAN</u>               | 39.24 | 36 | 48 | 48 | Y | OS=Homo sapiens OX=9606 GN=FASN PE=1 SV=3<br>Xanthine dehydrogenase/oxidase                                                                            |
| <u>tr B4DRU6 B4DRU6_HUMAN</u>         | 38.04 | 58 | 47 | 9  | Y | OS=Homo sapiens OX=9606 GN=XDH PE=1 SV=4<br>cDNA FLJ54657, highly similar to Keratin, type II cytoskeletal 6A OS=Homo sapiens OX=9606 PE=2 SV=1        |
| <u>P21399 ACOC_HUMAN</u>              | 36.08 | 10 | 5  | 5  | Y | Cytoplasmic aconitate hydratase<br>OS=Homo sapiens OX=9606 GN=ACO1 PE=1 SV=3                                                                           |
| <u>P25311 ZA2G_HUMAN</u>              | 35.73 | 54 | 14 | 14 | Y | Zinc-alpha-2-glycoprotein OS=Homo sapiens OX=9606 GN=AZGP1 PE=1 SV=2                                                                                   |
| <u>tr A0A024RDE6 A0A024RDE6_HUMAN</u> | 35.38 | 54 | 13 | 1  | Y | Secreted phosphoprotein 1 (Osteopontin, bone sialoprotein I, early T-lymphocyte activation 1), isoform CRA_c OS=Homo sapiens OX=9606 GN=SPP1 PE=3 SV=1 |
| <u>P61626 LYSC_HUMAN</u>              | 35.37 | 26 | 4  | 4  | Y | Lysozyme C<br>OS=Homo sapiens OX=9606 GN=LYZ PE=1 SV=1                                                                                                 |
| <u>P12273 PIP_HUMAN</u>               | 34.85 | 48 | 5  | 5  | Y | Prolactin-inducible protein<br>OS=Homo sapiens OX=9606 GN=PIP PE=1 SV=1                                                                                |
| <u>Q96KP4 CNDP2_HUMAN</u>             | 33.71 | 33 | 12 | 12 | Y | Cytosolic non-specific dipeptidase<br>OS=Homo sapiens OX=9606 GN=CNDP2 PE=1 SV=2                                                                       |
| <u>tr B2R888 B2R888_HUMAN</u>         | 33.42 | 57 | 16 | 16 | Y | Monocyte differentiation antigen CD14<br>OS=Homo sapiens OX=9606 PE=2 SV=1                                                                             |
| <u>tr A0A5C2GIW7 A0A5C2GIW7_HUMAN</u> | 31.43 | 15 | 1  | 1  | Y | IG c259_light_IGLV1-40_IGLJ1 (Fragment)<br>OS=Homo sapiens OX=9606 PE=2 SV=1                                                                           |
| <u>tr A0A024R1Y2 A0A024R1Y2_HUMAN</u> | 31.31 | 12 | 9  | 9  | Y | ATP-citrate synthase<br>OS=Homo sapiens OX=9606 GN=ACLY PE=3 SV=1                                                                                      |
| <u>P50395 GDIB_HUMAN</u>              | 30.62 | 42 | 14 | 14 | Y | Rab GDP dissociation inhibitor beta<br>OS=Homo sapiens OX=9606 GN=GDI2 PE=1 SV=2                                                                       |
| <u>P02647 APOA1_HUMAN</u>             | 29.82 | 49 | 15 | 15 | Y | Apolipoprotein A-I<br>OS=Homo sapiens OX=9606 GN=APOA1 PE=1 SV=1                                                                                       |
| <u>P47710 CASA1_HUMAN</u>             | 29.03 | 50 | 13 | 3  | Y | Alpha-S1-casein<br>OS=Homo sapiens OX=9606 GN=CSN1S1 PE=1 SV=1                                                                                         |
| <u>P13647 K2C5_HUMAN</u>              | 28.97 | 58 | 49 | 4  | Y | Keratin, type II cytoskeletal 5<br>OS=Homo sapiens OX=9606 GN=KRT5 PE=1 SV=3                                                                           |

|                                       |       |    |    |    |   |                                                                                                                             |
|---------------------------------------|-------|----|----|----|---|-----------------------------------------------------------------------------------------------------------------------------|
| <u>P02533 K1C14_HUMAN</u>             | 28.80 | 77 | 41 | 18 | Y | Keratin, type I cytoskeletal 14<br>OS=Homo sapiens OX=9606 GN=KRT14 PE=1 SV=4                                               |
| <u>P08758 ANXA5_HUMAN</u>             | 28.73 | 20 | 5  | 5  | N | Annexin A5<br>OS=Homo sapiens OX=9606 GN=ANXA5 PE=1 SV=2                                                                    |
| <u>Q5D862 FILA2_HUMAN</u>             | 26.65 | 16 | 17 | 17 | Y | Filaggrin-2<br>OS=Homo sapiens OX=9606 GN=FLG2 PE=1 SV=1                                                                    |
| <u>Q9Y623 MYH4_HUMAN</u>              | 26.55 | 37 | 65 | 14 | Y | Myosin-4<br>OS=Homo sapiens OX=9606 GN=MYH4 PE=2 SV=2                                                                       |
| <u>tr V9HWN7 V9HWN7_HUMAN</u>         | 26.31 | 35 | 11 | 11 | Y | Fructose-bisphosphate aldolase<br>OS=Homo sapiens OX=9606 GN=HEL-S-87p PE=2 SV=1                                            |
| <u>tr A0A0S2Z3Y1 A0A0S2Z3Y1_HUMAN</u> | 26.26 | 27 | 14 | 9  | Y | Galectin-3-binding protein (Fragment)<br>OS=Homo sapiens OX=9606 GN=LGALS3BP PE=2 SV=1                                      |
| <u>tr Q6ZVX0 Q6ZVX0_HUMAN</u>         | 25.56 | 49 | 34 | 1  | Y | cDNA FLJ41981 fis, clone SMINT2011888, highly similar to Protein Tro alpha1 H, myeloma<br>OS=Homo sapiens OX=9606 PE=2 SV=1 |
| <u>tr Q6N091 Q6N091_HUMAN</u>         | 23.85 | 33 | 25 | 3  | Y | Uncharacterized protein DKFZp686C02220 (Fragment)<br>OS=Homo sapiens OX=9606 GN=DKFZp686C02220 PE=2 SV=1                    |
| <u>tr A0A024R1A3 A0A024R1A3_HUMAN</u> | 23.56 | 3  | 2  | 2  | N | Ubiquitin-activating enzyme E1<br>OS=Homo sapiens OX=9606 GN=UBE1 PE=2 SV=1                                                 |
| <u>tr A0A024R6K8 A0A024R6K8_HUMAN</u> | 23.49 | 8  | 2  | 2  | N | T1-TrpRS<br>OS=Homo sapiens OX=9606 GN=WARS PE=2 SV=1                                                                       |
| <u>tr B4DEK5 B4DEK5_HUMAN</u>         | 23.13 | 9  | 4  | 4  | N | cDNA FLJ54596, highly similar to Proactivator polypeptide<br>OS=Homo sapiens OX=9606 PE=2 SV=1                              |
| <u>tr V9HVZ4 V9HVZ4_HUMAN</u>         | 23.01 | 33 | 8  | 8  | Y | Glyceraldehyde-3-phosphate dehydrogenase<br>OS=Homo sapiens OX=9606 GN=HEL-S-162eP PE=2 SV=1                                |
| <u>P07355 ANXA2_HUMAN</u>             | 22.76 | 33 | 12 | 12 | N | Annexin A2<br>OS=Homo sapiens OX=9606 GN=ANXA2 PE=1 SV=2                                                                    |
| <u>P04114 APOB_HUMAN</u>              | 22.54 | 24 | 78 | 78 | Y | Apolipoprotein B-100<br>OS=Homo sapiens OX=9606 GN=APOB PE=1 SV=2                                                           |
| <u>tr Q53QE9 Q53QE9_HUMAN</u>         | 22.29 | 46 | 14 | 9  | Y | UTP--glucose-1-phosphate uridylyltransferase (Fragment)<br>OS=Homo sapiens OX=9606 GN=UGP2                                  |

|                               |       |    |    |    |   |                                                                                       |
|-------------------------------|-------|----|----|----|---|---------------------------------------------------------------------------------------|
| <u>Q86YZ3/HORN_HUMAN</u>      | 20.68 | 13 | 20 | 20 | Y | PE=3 SV=1<br>Hornerin<br>OS=Homo sapiens OX=9606 GN=HRNR PE=1 SV=2                    |
| <u>P14550/AK1A1_HUMAN</u>     | 20.64 | 24 | 7  | 7  | N | Aldo-keto reductase family 1 member A1<br>OS=Homo sapiens OX=9606 GN=AKR1A1 PE=1 SV=3 |
| <u>tr/Q53YY1/Q53YY1_HUMAN</u> | 20.41 | 26 | 8  | 8  | Y | Angiotensin 1-10<br>OS=Homo sapiens OX=9606 GN=AGT PE=2 SV=1                          |
| <u>tr/Q53YD7/Q53YD7_HUMAN</u> | 20.35 | 5  | 2  | 2  | N | Elongation factor 1-gamma<br>OS=Homo sapiens OX=9606 GN=EEF1G PE=2 SV=1               |
| <u>P11021/BIP_HUMAN</u>       | 20.30 | 36 | 19 | 16 | Y | Endoplasmic reticulum chaperone BiP<br>OS=Homo sapiens OX=9606 GN=HSPA5 PE=1 SV=2     |

Table 1. 51 differentially expressed peptides identified by Label free software. PTM: post-transcriptional modification. Y: Yes. N: No.
