# Supplementary material for: Proteomic analysis of exosomes derived from human mature milk and colostrum of mothers with term, late preterm, or very preterm delivery
Source: Royal Society of Chemistry journal article supplement (doi:10.1039/d3ay01114c), 2023-01-01
Supplement: d3ay01114c2.pdf [file d3ay01114c2.pdf]

| <b>Accession</b>  | <b>Sum PEP Score</b> | <b>Coverage (%)</b> | <b># Peptides</b> | <b># Unique</b> | <b>Description</b>                                                                                                         |
|-------------------|----------------------|---------------------|-------------------|-----------------|----------------------------------------------------------------------------------------------------------------------------|
| <u>P01024</u>     | 655,989              | 71,7979555          | 102               | 91              | Complement C3<br>OS=Homo sapiens OX=9606 GN=C3 PE=1 SV=2                                                                   |
| <u>P49327</u>     | 367,223              | 46,23655914         | 84                | 84              | Fatty acid synthase<br>OS=Homo sapiens OX=9606 GN=FASN PE=1 SV=3                                                           |
| <u>B9EJA8</u>     | 293,146              | 43,40659341         | 62                | 62              | Mannose receptor, C type 1-like 1<br>OS=Homo sapiens OX=9606 GN=MRC1L1 PE=2 SV=1                                           |
| <u>P47989</u>     | 287,339              | 36,90922731         | 45                | 45              | Xanthine dehydrogenase/oxidase<br>OS=Homo sapiens OX=9606 GN=XDH PE=1 SV=4                                                 |
| <u>P01833</u>     | 269,043              | 60,20942408         | 44                | 44              | Polymeric immunoglobulin receptor<br>OS=Homo sapiens OX=9606 GN=PIGR PE=1 SV=4                                             |
| <u>O75612</u>     | 264,446              | 54,08496732         | 39                | 27              | Carboxylic ester hydrolase (Fragment)<br>OS=Homo sapiens OX=9606 PE=2 SV=1                                                 |
| <u>B3KS79</u>     | 206,167              | 58,48214286         | 27                | 27              | cDNA FLJ35730 fis, clone TEST12003131, highly similar to<br>ALPHA-1-ANTICHYMOTRYPSIN OS=Homo sapiens OX=9606 PE=2 SV=1     |
| <u>B4E1B2</u>     | 189,216              | 50,73746313         | 31                | 10              | Beta-1 metal-binding globulin<br>OS=Homo sapiens OX=9606 PE=2 SV=1                                                         |
| <u>AOA384MDQ7</u> | 170,553              | 66,02870813         | 29                | 4               | Epididymis secretory sperm binding protein<br>OS=Homo sapiens OX=9606 PE=2 SV=1                                            |
| <u>E9PFZ2</u>     | 154,586              | 43,12896406         | 36                | 7               | Ceruloplasmin<br>OS=Homo sapiens OX=9606 GN=CP PE=1 SV=1                                                                   |
| <u>AOA024R462</u> | 125,229              | 26,83651805         | 37                | 37              | Fibronectin<br>OS=Homo sapiens OX=9606 GN=FN1 PE=4 SV=1                                                                    |
| <u>A1A4E9</u>     | 124,862              | 58,29694323         | 28                | 10              | Keratin 13<br>OS=Homo sapiens OX=9606 GN=KRT13 PE=1 SV=1                                                                   |
| <u>P10909-2</u>   | 123,065              | 37,1257485          | 21                | 21              | Isoform 2 of Clusterin<br>OS=Homo sapiens OX=9606 GN=CLU                                                                   |
| <u>Q6ZW64</u>     | 118,507              | 44,12955466         | 20                | 2               | cDNA FLJ41552 fis, clone COLON2004478, highly similar to<br>Protein Tro alpha1 H,myeloma OS=Homo sapiens OX=9606 PE=2 SV=1 |
| <u>AOA024RC55</u> | 111,063              | 57,10594315         | 19                | 19              | Lactadherin<br>OS=Homo sapiens OX=9606 GN=MFGE8 PE=4 SV=1                                                                  |
| <u>Q13410</u>     | 109,425              | 38,97338403         | 21                | 21              | Butyrophilin subfamily 1 member A1                                                                                         |

|                   |         |             |    |    |                                                                                  |
|-------------------|---------|-------------|----|----|----------------------------------------------------------------------------------|
| <u>Q99541</u>     | 104,842 | 51,94508009 | 17 | 17 | OS=Homo sapiens OX=9606 GN=BTN1A1 PE=1 SV=3<br>Perilipin-2                       |
| <u>O00391</u>     | 102,368 | 38,82195448 | 24 | 24 | OS=Homo sapiens OX=9606 GN=PLIN2 PE=1 SV=2<br>Sulfhydryl oxidase 1               |
| <u>P0DOX2</u>     | 91,336  | 40,43956044 | 16 | 4  | OS=Homo sapiens OX=9606 GN=QSOX1 PE=1 SV=3<br>Immunoglobulin alpha-2 heavy chain |
| <u>AOA140VK00</u> | 91,182  | 57,71812081 | 19 | 19 | OS=Homo sapiens OX=9606 PE=1 SV=2<br>Testicular tissue protein Li 227            |
| <u>B2R888</u>     | 89,882  | 60,8        | 15 | 15 | OS=Homo sapiens OX=9606 PE=2 SV=1<br>Monocyte differentiation antigen CD14       |
| <u>P15291</u>     | 82,938  | 47,73869347 | 11 | 11 | OS=Homo sapiens OX=9606 PE=2 SV=1<br>Beta-1,4-galactosyltransferase 1            |
| <u>Q08380</u>     | 78,132  | 32,30769231 | 18 | 18 | OS=Homo sapiens OX=9606 GN=B4GALT1 PE=1 SV=5<br>Galectin-3-binding protein       |
| <u>P47710</u>     | 75,73   | 50,27027027 | 9  | 8  | OS=Homo sapiens OX=9606 GN=LGALS3BP PE=1 SV=1<br>Alpha-S1-casein                 |
| <u>B7ZKJ8</u>     | 68,28   | 28,77005348 | 19 | 19 | OS=Homo sapiens OX=9606 GN=CSN1S1 PE=1 SV=1<br>ITIH4 protein                     |
| <u>P02774-3</u>   | 63,233  | 32,86004057 | 16 | 16 | OS=Homo sapiens OX=9606 GN=GC<br>Isoform 3 of Vitamin D-binding protein          |
| <u>Q6WN34-2</u>   | 57,946  | 33,2594235  | 10 | 3  | OS=Homo sapiens OX=9606 GN=CHRDL2<br>Isoform 2 of Chordin-like protein 2         |
| <u>P07498</u>     | 56,07   | 53,84615385 | 7  | 7  | OS=Homo sapiens OX=9606 GN=CSN3 PE=1 SV=3<br>Kappa-casein                        |
| <u>B4DUH8</u>     | 52,221  | 37,82051282 | 9  | 3  | OS=Homo sapiens OX=9606 PE=2 SV=1<br>Carbonic anhydrase                          |
| <u>P05155-3</u>   | 51,418  | 21,78217822 | 12 | 12 | OS=Homo sapiens OX=9606 GN=SERPING1<br>Isoform 3 of Plasma protease C1 inhibitor |
| <u>B4E1Z4</u>     | 48,308  | 13,90205371 | 17 | 17 | OS=Homo sapiens OX=9606 PE=1 SV=1<br>C3/C5 convertase                            |
| <u>A4D1B1</u>     | 46,964  | 24,78813559 | 10 | 10 | OS=Homo sapiens OX=9606 GN=CD36 PE=2 SV=1<br>Glycoprotein IIIb                   |

|                   |        |             |    |    |                                                                                                          |
|-------------------|--------|-------------|----|----|----------------------------------------------------------------------------------------------------------|
| <u>W5RWE1</u>     | 46,625 | 64,60176991 | 8  | 8  | Beta-casein<br>OS=Homo sapiens OX=9606 GN=CSN2 PE=1 SV=1                                                 |
| <u>P00738</u>     | 46,009 | 36,69950739 | 15 | 15 | Haptoglobin<br>OS=Homo sapiens OX=9606 GN=HP PE=1 SV=1                                                   |
| <u>Q6N093</u>     | 38,728 | 29,97601918 | 9  | 2  | Uncharacterized protein DKFZp686I04196 (Fragment)<br>OS=Homo sapiens OX=9606 GN=DKFZp686I04196 PE=2 SV=1 |
| <u>P12273</u>     | 33,072 | 49,31506849 | 6  | 6  | Prolactin-inducible protein<br>OS=Homo sapiens OX=9606 GN=PIP PE=1 SV=1                                  |
| <u>P04003</u>     | 27,605 | 13,06532663 | 7  | 7  | C4b-binding protein alpha chain<br>OS=Homo sapiens OX=9606 GN=C4BPA PE=1 SV=2                            |
| <u>G8H6I3</u>     | 26,559 | 43,26923077 | 6  | 6  | Endocrine and exocrine protein<br>OS=Homo sapiens OX=9606 GN=EECP PE=2 SV=1                              |
| <u>A0A5C2G943</u> | 24,891 | 37,03703704 | 3  | 1  | IGL c560_light_IGKV1-5_IGKJ3 (Fragment)<br>OS=Homo sapiens OX=9606 PE=2 SV=1                             |
| <u>A0A0G2JS65</u> | 24,817 | 1,509840927 | 7  | 7  | Mucin-4<br>OS=Homo sapiens OX=9606 GN=MUC4 PE=1 SV=1                                                     |
| <u>D9ZGG2</u>     | 21,916 | 12,55230126 | 5  | 5  | Vitronectin<br>OS=Homo sapiens OX=9606 GN=VTN PE=4 SV=1                                                  |
| <u>P01591</u>     | 17,333 | 39,62264151 | 6  | 6  | Immunoglobulin J chain<br>OS=Homo sapiens OX=9606 GN=JCHAIN PE=1 SV=4                                    |
| <u>A0A5C2G7C9</u> | 14,485 | 36,11111111 | 3  | 2  | IGL c374_light_IGKV3D-20_IGKJ2 (Fragment)<br>OS=Homo sapiens OX=9606 PE=2 SV=1                           |
| <u>P81605-2</u>   | 9,4    | 20,66115702 | 3  | 3  | Isoform 2 of Dermcidin<br>OS=Homo sapiens OX=9606 GN=DCD                                                 |
| <u>A0A5C2GEX6</u> | 8,253  | 14,96062992 | 1  | 1  | IGH + IGL c557_heavy_IGHV3-21_IGHD3-3_IGHJ4 (Fragment)<br>OS=Homo sapiens OX=9606 PE=2 SV=1              |

Table 1. 45 proteins identified in all samples by Proteome Discoverer software.
