# Supplementary material for: Proteomic analysis of exosomes derived from human mature milk and colostrum of mothers with term, late preterm, or very preterm delivery
Source: Royal Society of Chemistry journal article supplement (doi:10.1039/d3ay01114c), 2023-01-01
Supplement: d3ay01114c3.pdf [file d3ay01114c3.pdf]

| Neuron projection regeneration | Neuron projection development | Neurogenesis | Neural nucleus development | Protein                                              |
|--------------------------------|-------------------------------|--------------|----------------------------|------------------------------------------------------|
|                                |                               | ACSL3        |                            | Long-chain-fatty-acid--CoA ligase 3                  |
|                                | ACSL4                         | ACSL4        |                            | Long-chain-fatty-acid--CoA ligase 4                  |
|                                | AGRN                          | AGRN         |                            | Agrin                                                |
|                                |                               | AGT          |                            | Angiotensinogen                                      |
|                                |                               |              | ALDH1A3                    | Aldehyde dehydrogenase family 1 member A3            |
|                                |                               | ANXA1        |                            | Annexin A1                                           |
| APOA1                          | APOA1                         | APOA1        |                            | Apolipoprotein A-I                                   |
| APOD                           | APOD                          | APOD         |                            | Apolipoprotein D                                     |
|                                | APOE                          | APOE         |                            | Apolipoprotein E                                     |
|                                | ARF4                          | ARF4         |                            | ADP-ribosylation factor 4                            |
|                                |                               | ARHGDI A     |                            | Rho GDP-dissociation inhibitor 1                     |
|                                |                               | CALR         |                            | Calreticulin                                         |
|                                |                               | CD9          |                            | CD9 antigen                                          |
|                                | CDC42                         | CDC42        | CDC42                      | Cell division control protein 42 homolog             |
|                                | CDH1                          | CDH1         |                            | Cadherin-1                                           |
|                                |                               | CFL1         |                            | Cofilin-1                                            |
|                                |                               | CIB1         |                            | Calcium and integrin binding 1                       |
|                                |                               | CLU          |                            | Clusterin                                            |
|                                | CNP                           | CNP          | CNP                        | 2',3'-cyclic-nucleotide 3'-phosphodiesterase         |
|                                |                               | CRABP2       |                            | Cellular retinoic acid-binding protein 2             |
|                                |                               | CTS Z        |                            | Cathepsin Z                                          |
| DAG1                           | DAG1                          | DAG1         |                            | Dystroglycan 1                                       |
|                                | DDR1                          | DDR1         |                            | Epithelial discoidin domain-containing receptor 1    |
|                                | DPYSL2                        | DPYSL2       |                            | Dihydropyrimidinase-related protein 2                |
|                                |                               | DPYSL3       |                            | Dihydropyrimidinase-related protein 3                |
|                                |                               | EEF2         |                            | Elongation factor 2                                  |
|                                | ENAH                          | ENAH         |                            | Protein enabled homolog                              |
|                                | EPHA7                         | EPHA7        |                            | Ephrin type-A receptor 7                             |
|                                | EZR                           | EZR          |                            | Villin 2 (ezrin); Ezrin                              |
|                                |                               | F2           |                            | Prothrombin                                          |
|                                | FAM129B                       | FAM129B      |                            | Family with sequence similarity 129-member b         |
|                                |                               | FKBP4        |                            | Peptidyl-prolyl cis-trans isomerase FKBP4            |
|                                |                               | FN1          |                            | Fibronectin 1                                        |
| FOLR1                          | FOLR1                         | FOLR1        |                            | Folate receptor alpha                                |
|                                |                               |              | G6PD                       | Glucose-6-phosphate 1-dehydrogenase                  |
|                                |                               |              | GNB4                       | Guanine nucleotide-binding protein subunit beta-4    |
|                                |                               | GPR126       |                            | Adhesion G-protein coupled receptor G6               |
|                                |                               | GPR56        |                            | Adhesion G-protein coupled receptor G1               |
|                                |                               | GPRC5B       |                            | G-protein coupled receptor family C group 5 member B |
|                                |                               | GSN          |                            | Gelsolin                                             |

|       |          |          |                                                                            |
|-------|----------|----------|----------------------------------------------------------------------------|
|       |          | HEXB     | Beta-hexosaminidase subunit beta                                           |
|       | HSP90AA1 | HSP90AA1 | Heat shock protein HSP 90-alpha                                            |
|       | HSP90AB1 | HSP90AB1 | Heat shock protein 90 alpha family class b member 1                        |
|       |          | HSPA5    | HSPA5                                                                      |
|       |          | IL6ST    | Interleukin-6 receptor subunit beta                                        |
|       | IQGAP1   | IQGAP1   | Iq motif containing gtpase activating protein 1                            |
|       |          | IST1     | IST1 homolog                                                               |
|       |          | KLK6     | Kallikrein-6                                                               |
|       | LAMB1    | LAMB1    | Laminin subunit beta-1                                                     |
| LAMB2 | LAMB2    | LAMB2    | Laminin subunit beta-2                                                     |
|       |          | LDHA     | L-lactate dehydrogenase a chain                                            |
|       | LRP2     | LRP2     | Low-density lipoprotein receptor-related protein 2                         |
|       |          | MAN2A1   | Alpha-mannosidase 2                                                        |
| MATN2 | MATN2    | MATN2    | Matrilin-2;                                                                |
|       |          | MDGA2    | MAM domain-containing glycosylphosphatidylinositol anchor protein 2        |
|       |          | MYCBP2   | E3 ubiquitin-protein ligase MYCBP2                                         |
|       | MYCBP2   | NAGLU    | Alpha-N-acetylglucosaminidase                                              |
|       |          | NAPIL1   | Nucleosome assembly protein 1-like 1                                       |
|       |          | NCSTN    | Nicastrin                                                                  |
|       |          | NDRG2    | Ndr family member 2                                                        |
|       | NEO1     | NEO1     | Neogenin                                                                   |
|       |          | NME2     | Nucleoside diphosphate kinase                                              |
|       | NRP1     | NRP1     | Neuropilin-1                                                               |
|       |          | PADI2    | Protein-arginine deiminase type-2                                          |
|       | PHGDH    | PHGDH    | D-3-phosphoglycerate dehydrogenase                                         |
|       | POSTN    | POSTN    | Periostin                                                                  |
|       | PREX2    | PREX2    | Phosphatidylinositol 3,4,5-trisphosphate-dependent Rac exchanger 2 protein |
|       |          | PROM1    | Prominin-1                                                                 |
|       |          | PSAP     | Prosaposin                                                                 |
| PTPRF | PTPRF    | PTPRF    | Receptor-type tyrosine-protein phosphatase F                               |
|       | RAB10    | RAB10    | Ras-related protein Rab-10                                                 |
|       | RAB11A   | RAB11A   | Ras-related protein Rab-11A                                                |
|       | RAB8A    | RAB8A    | RAB8A, member RAS oncogene family                                          |
|       | RAC1     | RAC1     | Ras-related C3 botulinum toxin substrate 1                                 |
|       | RHOA     | RHOA     | RHOA                                                                       |
|       | RTN4     | RTN4     | Ras homolog gene family, member a                                          |
|       |          | S100A8   | Reticulon-4                                                                |
|       | SEMA4B   | SEMA4B   | Protein S100-A8                                                            |
|       |          | SERPINF1 | Semaphorin-4B                                                              |
|       |          | SERPINI1 | Pigment epithelium-derived factor;                                         |
|       |          | SERPINI1 | Neuroserpin                                                                |
|       | SLC9A3R1 | SLC9A3R1 | Na(+)/H(+) exchange regulatory                                             |

|     |        |        |                                           |
|-----|--------|--------|-------------------------------------------|
|     |        |        | cofactor NHE-RF1                          |
|     |        | SPINT1 | Serine peptidase inhibitor, kunitz type 1 |
|     |        | SPP1   | Secreted phosphoprotein 1                 |
|     | STK3   | STK3   | Serine/threonine-protein kinase 3         |
|     | STXBP1 | STXBP1 | Syntaxin-binding protein 1                |
|     |        | TLR2   | Toll-like receptor 2                      |
| TNC | TNC    | TNC    | Tenascin                                  |
|     | VCL    | VCL    | Vinculin                                  |
|     |        | VTN    | Vitronectin                               |
|     |        | WDR1   | WD repeat-containing protein 1            |
|     |        | YWHAE  | 14-3-3 protein epsilon                    |
|     |        | YWHAG  | 14-3-3 protein gamma                      |
|     |        | YWHAH  | 14-3-3 protein eta                        |
|     |        | YWHAZ  | 14-3-3 protein theta                      |
|     |        | YWHAQ  | 14-3-3 protein zeta/delta                 |

**Table 1.** 92 filtered proteins by Biological Process with the online tool STRING.

| <b>Prion disease</b> | <b>AD</b> | <b>PD</b> | <b>HD</b> | <b>Glycosphingolipid biosynthesis - ganglio series</b> | <b>Protein</b>                                                     |
|----------------------|-----------|-----------|-----------|--------------------------------------------------------|--------------------------------------------------------------------|
| PSMA2                | PSMA2     | PSMA2     | PSMA2     |                                                        | Proteasome subunit alpha type-2                                    |
| PSMA3                | PSMA3     | PSMA3     | PSMA3     |                                                        | Proteasome subunit alpha type-3                                    |
| PSMA4                | PSMA4     | PSMA4     | PSMA4     |                                                        | Proteasome subunit alpha type-4                                    |
| PSMA5                | PSMA5     | PSMA5     | PSMA5     |                                                        | Proteasome subunit alpha type-5                                    |
| PSMA6                | PSMA6     | PSMA6     | PSMA6     |                                                        | Proteasome subunit alpha type-6                                    |
| PSMA7                | PSMA7     | PSMA7     | PSMA7     |                                                        | Proteasome subunit alpha type-7                                    |
| PSMB1                | PSMB1     | PSMB1     | PSMB1     |                                                        | Proteasome subunit beta type-1                                     |
| PSMB2                | PSMB2     | PSMB2     | PSMB2     |                                                        | Proteasome subunit beta type-2                                     |
| PSMB3                | PSMB3     | PSMB3     | PSMB3     |                                                        | Proteasome subunit beta type-3                                     |
| PSMB5                | PSMB5     | PSMB5     | PSMB5     |                                                        | Proteasome subunit beta type-5                                     |
| PSMB6                | PSMB6     | PSMB6     | PSMB6     |                                                        | Proteasome subunit beta type-6                                     |
| PSMC3                | PSMC3     | PSMC3     | PSMC3     |                                                        | 26S proteasome regulatory subunit 6A                               |
| PSMC6                | PSMC6     | PSMC6     | PSMC6     |                                                        | 26S proteasome regulatory subunit 10B                              |
| PSMD2                | PSMD2     | PSMD2     | PSMD2     |                                                        | 26S proteasome non-ATPase regulatory subunit 2                     |
| PSMD3                | PSMD3     | PSMD3     | PSMD3     |                                                        | 26S proteasome non-ATPase regulatory subunit 3                     |
| PSMD11               | PSMD11    | PSMD11    | PSMD11    |                                                        | 26S proteasome non-ATPase regulatory subunit 11                    |
| ATP5B                | ATP5B     | ATP5B     | ATP5B     |                                                        | ATP synthase subunit beta, mitochondrial                           |
| TUBA1C               | TUBA1C    | TUBA1C    | TUBA1C    |                                                        | Tubulin alpha-1C chain                                             |
| EIF2S1               | EIF2S1    | EIF2S1    |           |                                                        | Eukaryotic translation initiation factor 2 subunit 1               |
| UQCRCF1              | UQCRCF1   | UQCRCF1   | UQCRCF1   |                                                        | Ubiquinol-cytochrome c reductase, rieske iron-sulfur polypeptide 1 |
| HSPA5                |           | HSPA5     |           |                                                        | 78 kDa glucose-regulated protein                                   |
| HSPA8                |           |           |           |                                                        | Heat shock cognate 71 kDa protein                                  |
| MT-CO1               | MT-CO1    | MT-CO1    | MT-CO1    |                                                        | Mitochondrially encoded cytochrome c oxidase i                     |
|                      | GNAQ      |           | GNAQ      |                                                        | Guanine nucleotide-binding protein G(q) subunit alpha              |
|                      | CALML5    | CALML5    |           |                                                        | Calmodulin-like protein 5                                          |
| CACNA1S              | CACNA1S   |           |           |                                                        | Voltage-dependent L-type calcium channel subunit alpha-1S          |
|                      |           |           | ACTR1A    |                                                        | Alpha-centractin                                                   |
|                      |           |           | ACTR1B    |                                                        | Beta-centractin                                                    |
|                      | APOE      |           |           |                                                        | Apolipoprotein E                                                   |
|                      |           |           | B4GALNT1  |                                                        | Beta-1,4 N-acetylgalactosaminyltransferase 1                       |
| C6                   |           |           |           |                                                        | Complement component C6                                            |
| C7                   |           |           |           |                                                        | Complement component C7                                            |
| C8A                  |           |           |           |                                                        | Complement component C8 alpha chain                                |
| C9                   |           |           |           |                                                        | Complement component C9                                            |
|                      | CAPN1     |           |           |                                                        | Calpain-1 catalytic subunit                                        |
|                      |           |           | CLTC      |                                                        | Clathrin heavy chain 1                                             |
|                      | GAPDH     |           |           |                                                        | Glyceraldehyde-3-phosphate                                         |

|       |      |                                                                     |
|-------|------|---------------------------------------------------------------------|
|       |      | dehydrogenase                                                       |
|       | GLB1 | Beta-galactosidase                                                  |
| GNAS  |      | Guanine nucleotide-binding protein G(s) subunit alpha isoforms XLas |
|       | GPX3 | Glutathione peroxidase 3                                            |
|       | HEXB | Beta-hexosaminidase subunit beta                                    |
|       | HEXA | Beta-hexosaminidase subunit alpha                                   |
| IDE   |      | Insulin-degrading enzyme                                            |
| LPL   |      | Lipoprotein lipase                                                  |
| NCSTN |      | Nicastrin                                                           |
| RTN3  |      | Reticulon-3                                                         |
| RTN4  |      | Reticulon-4                                                         |
|       | UBA1 | Ubiquitin-like modifier-activating enzyme 1                         |

**Table 2.** 47 filtered proteins by KEGG pathways with the online tool STRING. AD: Alzheimer's disease; PD: Parkinson's disease; HD: Huntington's disease.
