# Supplementary material for: Proteomic analysis of exosomes derived from human mature milk and colostrum of mothers with term, late preterm, or very preterm delivery
Source: Royal Society of Chemistry journal article supplement (doi:10.1039/d3ay01114c), 2023-01-01
Supplement: d3ay01114c4.pdf [file d3ay01114c4.pdf]

| <b>Accession</b>  | <b>Sum PEP Score</b> | <b>Coverage (%)</b> | <b># Peptides</b> | <b># Unique Peptides</b> | <b>Description</b>                                                                                                     |
|-------------------|----------------------|---------------------|-------------------|--------------------------|------------------------------------------------------------------------------------------------------------------------|
| <u>P49327</u>     | 1196,394             | 71,12704102         | 144               | 144                      | Fatty acid synthase<br>OS=Homo sapiens OX=9606 GN=FASN PE=1 SV=3                                                       |
| <u>P01024</u>     | 984,371              | 76,18761275         | 129               | 129                      | Complement C3<br>OS=Homo sapiens OX=9606 GN=C3 PE=1 SV=2                                                               |
| <u>P47989</u>     | 851,33               | 71,41785446         | 94                | 94                       | Xanthine dehydrogenase/oxidase<br>OS=Homo sapiens OX=9606 GN=XDH PE=1 SV=4                                             |
| <u>O75612</u>     | 608,864              | 65,19607843         | 56                | 10                       | Carboxylic ester hydrolase (Fragment)<br>OS=Homo sapiens OX=9606 PE=2 SV=1                                             |
| <u>P01833</u>     | 454,111              | 64,39790576         | 56                | 56                       | Polymeric immunoglobulin receptor<br>OS=Homo sapiens OX=9606 GN=PIGR PE=1 SV=4                                         |
| <u>C0JYY2</u>     | 420,573              | 31,36094675         | 110               | 110                      | Apolipoprotein B (Including Ag(X) antigen)<br>OS=Homo sapiens OX=9606 GN=APOB PE=4 SV=1                                |
| <u>Q99541</u>     | 397,177              | 80,09153318         | 39                | 39                       | Perilipin-2<br>OS=Homo sapiens OX=9606 GN=PLIN2 PE=1 SV=2                                                              |
| <u>B3KS79</u>     | 352,366              | 59,375              | 33                | 33                       | cDNA FLJ35730 fis, clone TESTI2003131, highly similar to ALPHA-1-ANTICHYMOTRYPSIN<br>OS=Homo sapiens OX=9606 PE=2 SV=1 |
| <u>A0A024R6I7</u> | 304,111              | 70,81339713         | 39                | 5                        | Alpha-1-antitrypsin<br>OS=Homo sapiens OX=9606 GN=SERPINA1 PE=1 SV=1                                                   |
| <u>P06733</u>     | 287,067              | 79,03225806         | 39                | 39                       | Alpha-enolase<br>OS=Homo sapiens OX=9606 GN=ENO1 PE=1 SV=2                                                             |
| <u>Q13410</u>     | 281,714              | 54,37262357         | 40                | 39                       | Butyrophilin subfamily 1 member A1<br>OS=Homo sapiens OX=9606 GN=BTN1A1 PE=1 SV=3                                      |
| <u>Q16851</u>     | 238,938              | 75,59055118         | 42                | 42                       | UTP--glucose-1-phosphate uridylyltransferase<br>OS=Homo sapiens OX=9606 GN=UGP2 PE=1 SV=5                              |
| <u>P10909-2</u>   | 211,583              | 39,12175649         | 26                | 26                       | Isoform 2 of Clusterin<br>OS=Homo sapiens OX=9606 GN=CLU                                                               |
| <u>B2R888</u>     | 210,893              | 69,6                | 22                | 22                       | Monocyte differentiation antigen CD14<br>OS=Homo sapiens OX=9606 PE=2 SV=1                                             |
| <u>P04406</u>     | 195,903              | 80,89552239         | 23                | 23                       | Glyceraldehyde-3-phosphate dehydrogenase<br>OS=Homo sapiens OX=9606 GN=GAPDH PE=1 SV=3                                 |
| <u>O00391</u>     | 179,823              | 42,57028112         | 31                | 31                       | Sulfhydryl oxidase 1                                                                                                   |

|                   |         |             |    |    |                                                                                                                                |
|-------------------|---------|-------------|----|----|--------------------------------------------------------------------------------------------------------------------------------|
| <u>P15291</u>     | 176,578 | 44,47236181 | 14 | 14 | OS=Homo sapiens OX=9606 GN=QSOX1 PE=1 SV=3<br>Beta-1,4-galactosyltransferase 1<br>OS=Homo sapiens OX=9606 GN=B4GALT1 PE=1 SV=5 |
| <u>A0A140VK00</u> | 171,329 | 60,40268456 | 21 | 21 | Testicular tissue protein Li 227<br>OS=Homo sapiens OX=9606 PE=2 SV=1                                                          |
| <u>P02647</u>     | 158,734 | 79,02621723 | 34 | 34 | Apolipoprotein A-I<br>OS=Homo sapiens OX=9606 GN=APOA1 PE=1 SV=1                                                               |
| <u>P0DOX2</u>     | 144,283 | 60,21978022 | 23 | 6  | Immunoglobulin alpha-2 heavy chain<br>OS=Homo sapiens OX=9606 PE=1 SV=2                                                        |
| <u>Q08380</u>     | 138,017 | 33,16239316 | 24 | 24 | Galectin-3-binding protein<br>OS=Homo sapiens OX=9606 GN=LGALS3BP PE=1 SV=1                                                    |
| <u>Q13228-4</u>   | 131,071 | 52,52918288 | 24 | 24 | Isoform 4 of Methanethiol oxidase<br>OS=Homo sapiens OX=9606 GN=SELENBP1                                                       |
| <u>P02774-3</u>   | 118,864 | 38,53955375 | 19 | 19 | Isoform 3 of Vitamin D-binding protein<br>OS=Homo sapiens OX=9606 GN=GC                                                        |
| <u>P07498</u>     | 107,615 | 70,32967033 | 10 | 10 | Kappa-casein<br>OS=Homo sapiens OX=9606 GN=CSN3 PE=1 SV=3                                                                      |
| <u>P02649</u>     | 106,586 | 64,3533123  | 20 | 18 | Apolipoprotein E<br>OS=Homo sapiens OX=9606 GN=APOE PE=1 SV=1                                                                  |
| <u>A8K2M5</u>     | 99,263  | 44,63157895 | 16 | 16 | Lipoprotein lipase<br>OS=Homo sapiens OX=9606 PE=2 SV=1                                                                        |
| <u>B4DUH8</u>     | 99,056  | 63,14102564 | 13 | 3  | Carbonic anhydrase<br>OS=Homo sapiens OX=9606 PE=2 SV=1                                                                        |
| <u>A0A0G2JS65</u> | 91,056  | 3,747640874 | 15 | 15 | Mucin-4<br>OS=Homo sapiens OX=9606 GN=MUC4 PE=1 SV=1                                                                           |
| <u>A4D1B1</u>     | 84,06   | 30,93220339 | 14 | 14 | Glycoprotein IIIb<br>OS=Homo sapiens OX=9606 GN=CD36 PE=2 SV=1                                                                 |
| <u>W5RWE1</u>     | 77,195  | 70,3539823  | 10 | 10 | Beta-casein<br>OS=Homo sapiens OX=9606 GN=CSN2 PE=2 SV=1                                                                       |
| <u>P15941-2</u>   | 77,188  | 8,860759494 | 9  | 9  | Isoform 2 of Mucin-1<br>OS=Homo sapiens OX=9606 GN=MUC1                                                                        |
| <u>G8H6I3</u>     | 46,212  | 56,73076923 | 10 | 10 | Endocrine and exocrine protein<br>OS=Homo sapiens OX=9606 GN=EECP PE=2 SV=1                                                    |

|                   |        |             |    |    |                                                                                |
|-------------------|--------|-------------|----|----|--------------------------------------------------------------------------------|
| <u>P19440</u>     | 43,326 | 22,49560633 | 12 | 12 | Glutathione hydrolase 1 proenzyme<br>OS=Homo sapiens OX=9606 GN=GGT1 PE=1 SV=2 |
| <u>A0A5C2G131</u> | 20,065 | 38,31775701 | 3  | 1  | IGL c2859_light_IGKV3-11_IGKJ5 (Fragment)<br>OS=Homo sapiens OX=9606 PE=2 SV=1 |
| <u>A0A5C2FYC1</u> | 15,483 | 24,7706422  | 2  | 1  | IGL c1166_light_IGKV3-20_IGKJ2 (Fragment)<br>OS=Homo sapiens OX=9606 PE=2 SV=1 |

Table 1. 35 proteins identified in all samples by Proteome Discoverer software.
