# Supplementary material for: Proteomic analysis of exosomes derived from human mature milk and colostrum of mothers with term, late preterm, or very preterm delivery
Source: Royal Society of Chemistry journal article supplement (doi:10.1039/d3ay01114c), 2023-01-01
Supplement: d3ay01114c5.pdf [file d3ay01114c5.pdf]

| <b>Accession</b>  | <b>Sum<br/>PEP Score</b> | <b>Coverage<br/>(%)</b> | <b># Peptides</b> | <b># Unique<br/>Peptides</b> | <b>Description</b>                                                                                                        |
|-------------------|--------------------------|-------------------------|-------------------|------------------------------|---------------------------------------------------------------------------------------------------------------------------|
| <u>P49327</u>     | 1196,394                 | 71,12704102             | 144               | 144                          | Fatty acid synthase<br>OS=Homo sapiens OX=9606 GN=FASN PE=1 SV=3                                                          |
| <u>P01024</u>     | 984,371                  | 76,18761275             | 129               | 129                          | Complement C3<br>OS=Homo sapiens OX=9606 GN=C3 PE=1 SV=2                                                                  |
| <u>P47989</u>     | 851,33                   | 71,41785446             | 94                | 94                           | Xanthine dehydrogenase/oxidase<br>OS=Homo sapiens OX=9606 GN=XDH PE=1 SV=4                                                |
| <u>O75612</u>     | 608,864                  | 65,19607843             | 56                | 10                           | Carboxylic ester hydrolase (Fragment)<br>OS=Homo sapiens OX=9606 PE=2 SV=1                                                |
| <u>P01833</u>     | 454,111                  | 64,39790576             | 56                | 56                           | Polymeric immunoglobulin receptor<br>OS=Homo sapiens OX=9606 GN=PIGR PE=1 SV=4                                            |
| <u>Q99541</u>     | 397,177                  | 80,09153318             | 39                | 39                           | Perilipin-2<br>OS=Homo sapiens OX=9606 GN=PLIN2 PE=1 SV=2                                                                 |
| <u>B3KS79</u>     | 352,366                  | 59,375                  | 33                | 33                           | cDNA FLJ35730 fis, clone TESTI2003131, highly similar<br>to ALPHA-1-ANTICHYMOTRYPSIN<br>OS=Homo sapiens OX=9606 PE=2 SV=1 |
| <u>Q13410</u>     | 281,714                  | 54,37262357             | 40                | 39                           | Butyrophilin subfamily 1 member A1<br>OS=Homo sapiens OX=9606 GN=BTN1A1 PE=1 SV=3                                         |
| <u>P10909-2</u>   | 211,583                  | 39,12175649             | 26                | 26                           | Isoform 2 of Clusterin<br>OS=Homo sapiens OX=9606 GN=CLU                                                                  |
| <u>B2R888</u>     | 210,893                  | 69,6                    | 22                | 22                           | Monocyte differentiation antigen CD14<br>OS=Homo sapiens OX=9606 PE=2 SV=1                                                |
| <u>O00391</u>     | 179,823                  | 42,57028112             | 31                | 31                           | Sulfhydryl oxidase 1<br>OS=Homo sapiens OX=9606 GN=QSOX1 PE=1 SV=3                                                        |
| <u>P15291</u>     | 176,578                  | 44,47236181             | 14                | 14                           | Beta-1,4-galactosyltransferase 1<br>OS=Homo sapiens OX=9606 GN=B4GALT1 PE=1 SV=5                                          |
| <u>A0A140VK00</u> | 171,329                  | 60,40268456             | 21                | 21                           | Testicular tissue protein Li 227<br>OS=Homo sapiens OX=9606 PE=2 SV=1                                                     |
| <u>P0DOX2</u>     | 144,283                  | 60,21978022             | 23                | 6                            | Immunoglobulin alpha-2 heavy chain<br>OS=Homo sapiens OX=9606 PE=1 SV=2                                                   |
| <u>Q08380</u>     | 138,017                  | 33,16239316             | 24                | 24                           | Galectin-3-binding protein<br>OS=Homo sapiens OX=9606 GN=LGALS3BP PE=1 SV=1                                               |
| <u>P02774-3</u>   | 118,864                  | 38,53955375             | 19                | 19                           | Isoform 3 of Vitamin D-binding protein<br>OS=Homo sapiens OX=9606 GN=GC                                                   |
| <u>P07498</u>     | 107,615                  | 70,32967033             | 10                | 10                           | Kappa-casein<br>OS=Homo sapiens OX=9606 GN=CSN3 PE=1 SV=3                                                                 |
| <u>B4DUH8</u>     | 99,056                   | 63,14102564             | 13                | 3                            | Carbonic anhydrase<br>OS=Homo sapiens OX=9606 PE=2 SV=1                                                                   |
| <u>A0A0G2JS65</u> | 91,056                   | 3,747640874             | 15                | 15                           | Mucin-4<br>OS=Homo sapiens OX=9606 GN=MUC4 PE=1 SV=1                                                                      |
| <u>A4D1B1</u>     | 84,06                    | 30,93220339             | 14                | 14                           | Glycoprotein IIIb<br>OS=Homo sapiens OX=9606 GN=CD36 PE=2 SV=1                                                            |
| <u>W5RWE1</u>     | 77,195                   | 70,3539823              | 10                | 10                           | Beta-casein<br>OS=Homo sapiens OX=9606 GN=CSN2 PE=2 SV=1                                                                  |
| <u>G8H6I3</u>     | 46,212                   | 56,73076923             | 10                | 10                           | Endocrine and exocrine protein<br>OS=Homo sapiens OX=9606 GN=EECP PE=2 SV=1                                               |

Table 1. 22 common proteins identified in all samples of exosomes and whole milk by Proteome Discoverer software.
